# Supplementary material
Source: publisher figshare collection journal article supplement (https://diabetesjournals.figshare.com/ndownloader/files/34051802)

## Online Appendix

**Online Table 1:** Comparison of infant characteristics at birth, 3-months and 12-months between those in whom maternal GDM was treated with lifestyle modification (n=116) and those in whom maternal GDM was treated with lifestyle + insulin (n=54) (there were 5 women in whom treatment regimen for GDM was not available).

**Online Figure 1:** Mean adjusted (A) change in weight Z-score from 3- to 12-months, (B) change in length Z-score from 3- to 12-months, (C) change in weight-for-length (WFL) Z-score from 3-to 12-months, and (D) change in BMI Z-score from 3- to 12-months by maternal gestational tolerance group, adjusted for maternal/paternal ethnicity, and duration of exclusive breastfeeding (WFL Z-score is additionally adjusted for age).

**Online Table 1:** Comparison of infant characteristics at birth, 3-months and 12-months between those in whom maternal GDM was treated with lifestyle modification (n=116) and those in whom maternal GDM was treated with lifestyle + insulin (n=54) (there were 5 women in whom treatment regimen for GDM was not available).

|                              | <b>Lifestyle<br/>Only<br/>(n=116)</b> | <b>Lifestyle<br/>and Insulin<br/>(n=54)</b> | <b>p</b> |
|------------------------------|---------------------------------------|---------------------------------------------|----------|
| <b><u>At Birth</u></b>       |                                       |                                             |          |
| Birthweight (g)              | 3259.6 ± 455.9                        | 3297.3 ± 401.4                              | 0.60     |
| Macrosomia n(%)              | 4 (3.4)                               | 3 (5.6)                                     | 0.68     |
| <b><u>At 3-months</u></b>    |                                       |                                             |          |
| Skinfold thickness:          |                                       |                                             |          |
| Triceps (mm)                 | 10.1 ± 1.8                            | 10.3 ± 1.8                                  | 0.54     |
| Biceps (mm)                  | 7.1 ± 1.8                             | 7.1 ± 1.5                                   | 0.83     |
| Subscapular (mm)             | 7.3 ± 1.5                             | 7.5 ± 1.4                                   | 0.31     |
| Suprailiac (mm)              | 7.5 ± 1.8                             | 7.6 ± 1.7                                   | 0.84     |
| Sum of skinfolds (mm)        | 32.1 ± 5.2                            | 32.5 ± 4.7                                  | 0.61     |
| Abdominal circumference (cm) | 41.0 ± 3.0                            | 40.5 ± 2.8                                  | 0.32     |
| Length (cm)                  | 61.0 ± 3.4                            | 60.9 ± 2.7                                  | 0.89     |
| Length Z-score               | -0.2 ± 1.5                            | -0.3 ± 1.4                                  | 0.77     |
| Weight (kg)                  | 6.3 ± 0.8                             | 6.3 ± 0.9                                   | 0.72     |
| Weight Z-score               | -0.1 ± 1.1                            | -0.03 ± 1.1                                 | 0.73     |
| Weight-for-length Z-score    | 0.2 ± 1.2                             | 0.3 ± 0.8                                   | 0.59     |
| BMI (kg/m <sup>2</sup> )     | 16.8 ± 1.6                            | 17.0 ± 1.4                                  | 0.54     |
| BMI Z-score                  | 0.02 ± 1.1                            | 0.2 ± 0.9                                   | 0.42     |
| <b><u>At 12-months</u></b>   |                                       |                                             |          |
| Skinfold thickness:          |                                       |                                             |          |
| Triceps (mm)                 | 10.3 ± 1.8                            | 9.5 ± 2.3                                   | 0.06     |
| Biceps (mm)                  | 6.2 ± 1.7                             | 6.8 ± 1.8                                   | 0.15     |
| Subscapular (mm)             | 6.7 ± 1.7                             | 7.1 ± 1.6                                   | 0.33     |
| Suprailiac (mm)              | 5.6 ± 1.5                             | 5.6 ± 1.7                                   | 0.85     |
| Sum of skinfolds (mm)        | 27.6 ± 7.1                            | 28.8 ± 5.2                                  | 0.41     |
| Abdominal circumference (cm) | 45.0 ± 4.2                            | 43.6 ± 3.3                                  | 0.11     |
| Length (cm)                  | 75.1 ± 3.9                            | 75.5 ± 3.7                                  | 0.63     |
| Length Z-score               | -0.2 ± 2.4                            | -0.1 ± 1.2                                  | 0.78     |
| Weight (kg)                  | 9.9 ± 1.6                             | 9.5 ± 1.0                                   | 0.29     |
| Weight Z-score               | 0.3 ± 1.2                             | -0.1 ± 0.9                                  | 0.08     |
| Weight-for-length Z-score    | 0.4 ± 1.1                             | 0.1 ± 0.9                                   | 0.11     |
| BMI (kg/m <sup>2</sup> )     | 17.2 ± 1.8                            | 16.7 ± 1.3                                  | 0.14     |
| BMI Z-score                  | 0.4 ± 1.1                             | 0.1 ± 1.0                                   | 0.17     |

**Online Figure 1:** Mean adjusted (A) change in weight Z-score from 3- to 12-months, (B) change in length Z-score from 3- to 12-months, (C) change in weight-for-length (WFL) Z-score from 3-to 12-months, and (D) change in BMI Z-score from 3- to 12-months by maternal gestational tolerance group, adjusted for maternal/paternal ethnicity, and duration of exclusive breastfeeding (WFL Z-score is additionally adjusted for age).

**Panel A: Change in weight Z-score from 3- to 12-months**

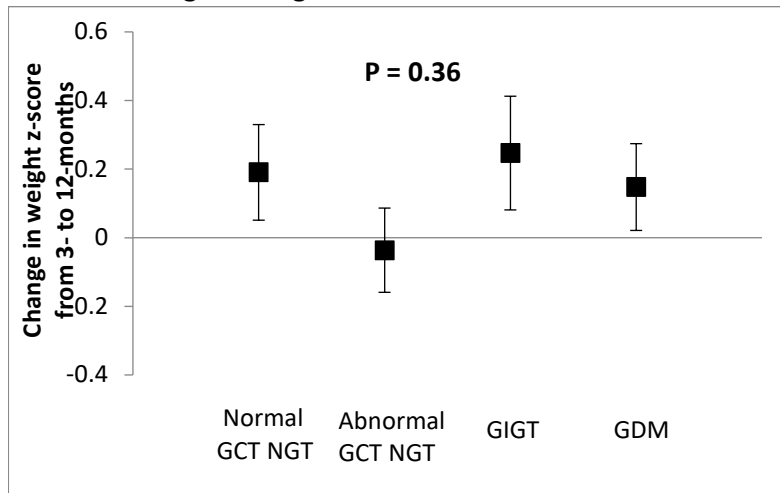

**Panel B: Change in length Z-score from 3- to 12-months**

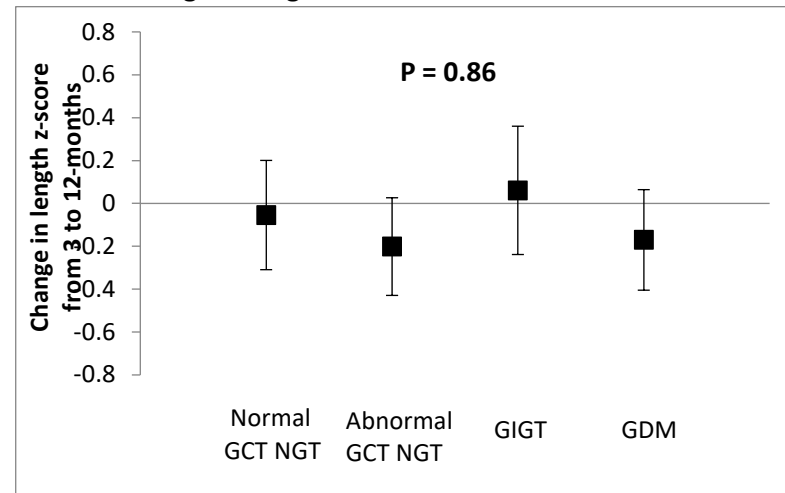

**Panel C: Change in weight-for-length Z-score from 3- to 12-months**

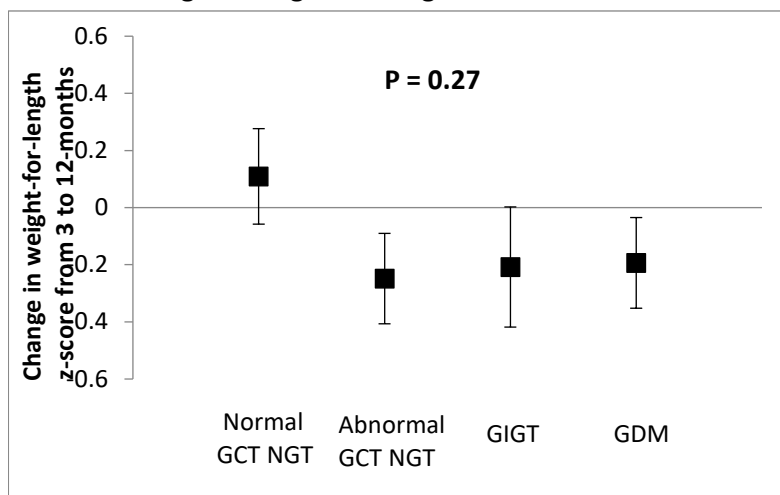

**Panel D: Change in BMI Z-score from 3- to 12-months**

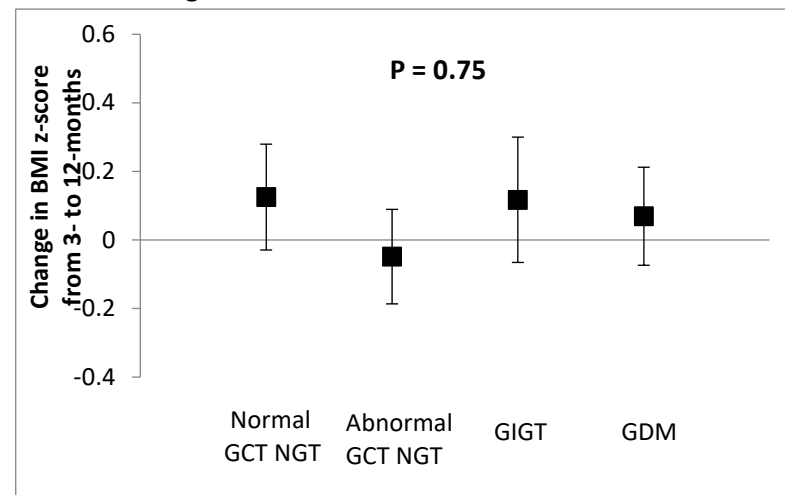

Supplement: Supplementary file 1 [file 34051802]
